# Supplementary material for: KOH-modified bamboo charcoal loaded with α-FeOOH for efficient adsorption of copper and fluoride ions from aqueous solution
Source: Royal Society of Chemistry journal article supplement (doi:10.1039/d3ra05315f), 2023-01-01
Supplement: d3ra05315f1.pdf [file d3ra05315f1.pdf]

## Supplementary information

### **KOH-modified bamboo charcoal loaded with $\alpha$ -FeOOH for efficient adsorption of copper and fluoride ions from aqueous solution**

Wei Yang,<sup>\*a</sup> Lei Zhang,<sup>b</sup> Meng Li,<sup>c</sup> Ting Zhang,<sup>a</sup> Yue Liu<sup>a</sup> and Juan Liu<sup>a</sup>

<sup>a</sup> School of Environmental Science and Engineering, Hubei Polytechnic University, Huangshi 435003, Hubei, China. E-mail: yw198909@163.com

<sup>b</sup> MWR Standard & Quality Control Research Institute, Hangzhou 310024, Zhejiang, China.

<sup>c</sup> School of Civil Engineering and Architecture, Wuhan University of Technology, Wuhan 430070, Hubei, China

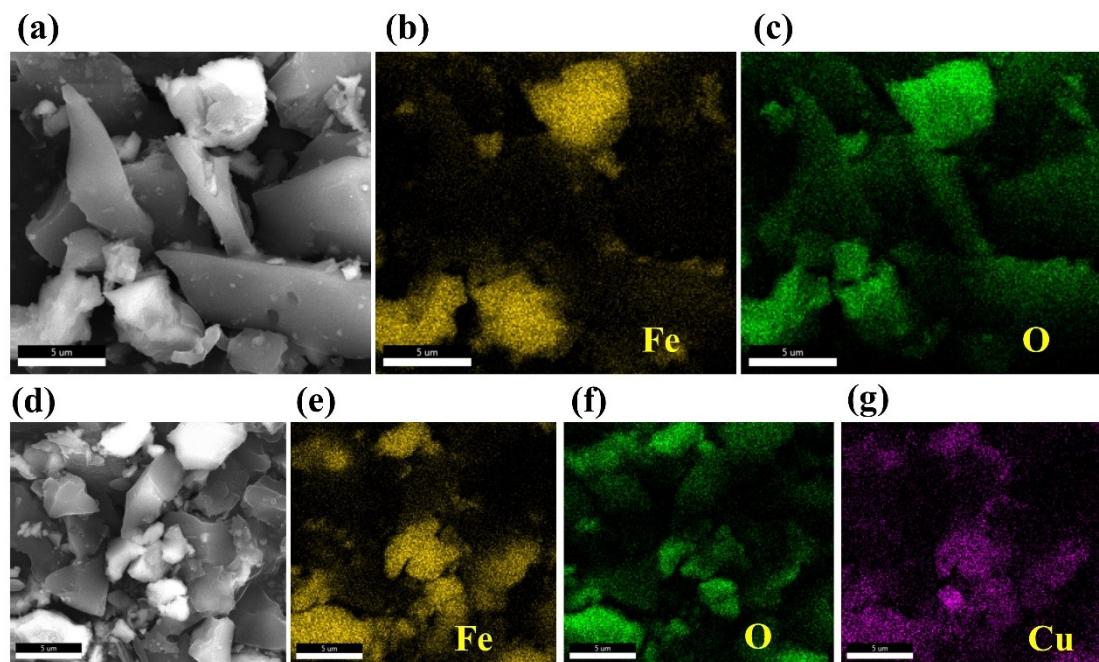

**Fig. S1** SEM images of FKBC before (a), and after (d)  $\text{Cu}^{2+}$  adsorption; EDS elemental mappings of Fe (b), O (c) before, and Fe (e), O (f), Cu (g) after  $\text{Cu}^{2+}$  adsorption.

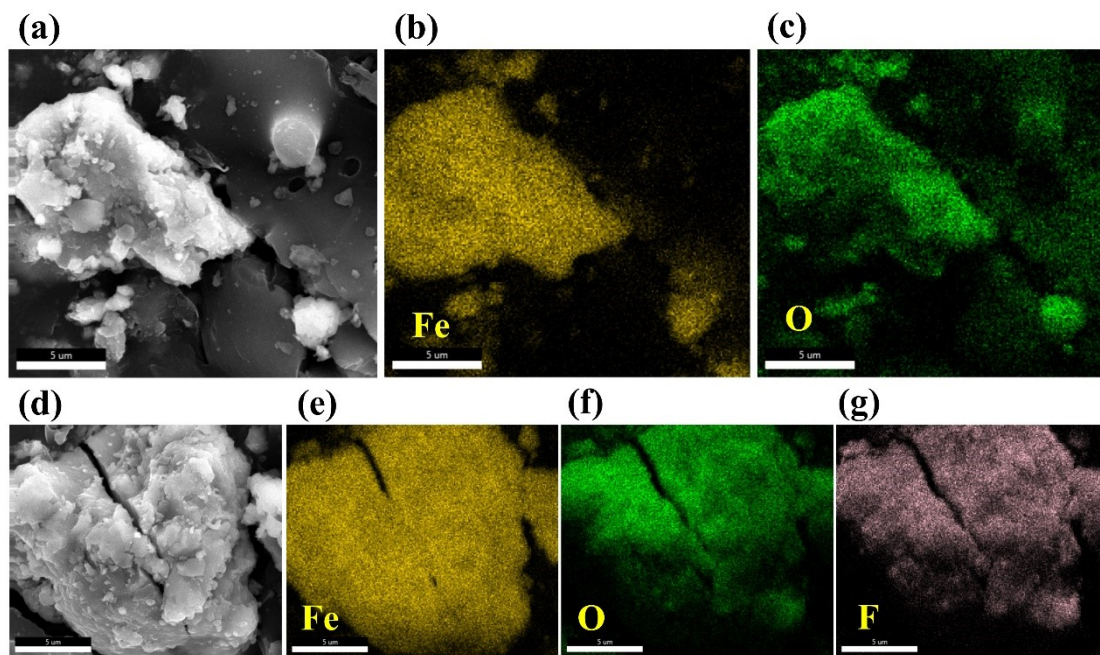

**Fig. S2** SEM images of FKBC before (a), and after (d) F<sup>-</sup> adsorption; EDS elemental mappings of Fe (b), O (c) before, and Fe (e), O (f), F (g) after F<sup>-</sup> adsorption.

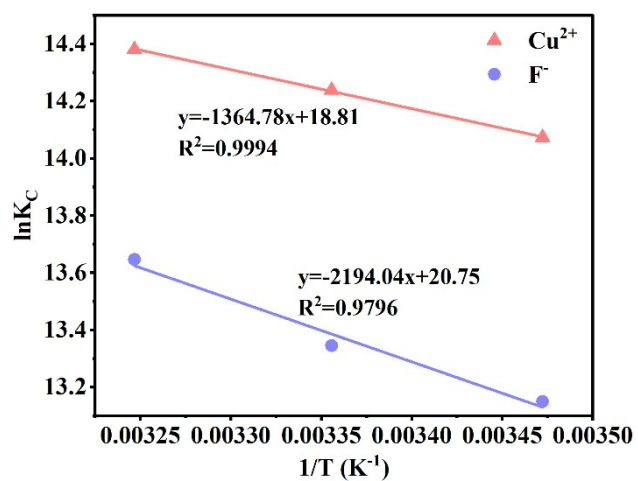

**Fig. S3** Thermodynamic analysis of  $\text{Cu}^{2+}$  and  $\text{F}^-$  adsorption by FKBC.

**Table S1** Batch experimental conditions for Cu<sup>2+</sup> and F<sup>-</sup> adsorption by FKBC.

| Influencing factor    | Ion              | Volume (mL) | pH   | Time (min) | Dosage (g) | Concentration (mg L <sup>-1</sup> ) | Temperature (K) |
|-----------------------|------------------|-------------|------|------------|------------|-------------------------------------|-----------------|
| pH                    | Cu <sup>2+</sup> | 100         | 2-6  | 240        | 0.2        | 200                                 | 298             |
|                       | F <sup>-</sup>   | 100         | 2-10 | 240        | 0.2        | 80                                  | 298             |
| Contact time          | Cu <sup>2+</sup> | 100         | 5    | 5-240      | 0.2        | 200                                 | 298             |
|                       | F <sup>-</sup>   | 100         | 7    | 5-240      | 0.2        | 80                                  | 298             |
| Adsorbent dose        | Cu <sup>2+</sup> | 100         | 5    | 240        | 0.05-0.4   | 200                                 | 298             |
|                       | F <sup>-</sup>   | 100         | 7    | 240        | 0.05-0.4   | 80                                  | 298             |
| Initial concentration | Cu <sup>2+</sup> | 100         | 5    | 240        | 0.2        | 50-400                              | 298             |
|                       | F <sup>-</sup>   | 100         | 7    | 240        | 0.2        | 20-160                              | 298             |
| Kinetics              | Cu <sup>2+</sup> | 100         | 5    | 5-240      | 0.2        | 200                                 | 288-308         |
|                       | F <sup>-</sup>   | 100         | 7    | 5-240      | 0.2        | 80                                  | 288-308         |
| Isotherms             | Cu <sup>2+</sup> | 100         | 5    | 240        | 0.2        | 50-400                              | 288-308         |
|                       | F <sup>-</sup>   | 100         | 7    | 240        | 0.2        | 20-160                              | 288-308         |
| Thermodynamics        | Cu <sup>2+</sup> | 100         | 5    | 240        | 0.2        | 50-400                              | 288-308         |
|                       | F <sup>-</sup>   | 100         | 7    | 240        | 0.2        | 20-160                              | 288-308         |

**Table S2** Experimental conditions on the effect of coexisting ions for selective Cu<sup>2+</sup> and F<sup>-</sup> adsorption by FKBC.

| Ion              | Volume (mL) | Solution pH | Initial concentration (mg L <sup>-1</sup> ) | Contact time (min) | Dosage (g) | Coexisting ions                                                                                                               | Coexisting ions concentration (mg L <sup>-1</sup> ) | Temperature (K) |
|------------------|-------------|-------------|---------------------------------------------|--------------------|------------|-------------------------------------------------------------------------------------------------------------------------------|-----------------------------------------------------|-----------------|
| Cu <sup>2+</sup> | 100         | 5           | 200                                         | 240                | 0.2        | K <sup>+</sup><br>Ni <sup>2+</sup><br>Cd <sup>2+</sup><br>Cl <sup>-</sup><br>SO <sub>4</sub> <sup>2-</sup><br>Cl <sup>-</sup> | 0, 100, 200, 300                                    | 298K            |
| F <sup>-</sup>   | 100         | 7           | 80                                          | 240                | 0.2        | NO <sub>3</sub> <sup>-</sup><br>SO <sub>4</sub> <sup>2-</sup><br>Na <sup>+</sup><br>NH <sub>4</sub> <sup>+</sup>              | 0, 40, 80, 120                                      | 298K            |

**Table S3** Experimental conditions for Cu<sup>2+</sup> and F<sup>-</sup> adsorption-desorption.

| Ion              | Volume (mL) | Solution pH | Initial concentration (mg L <sup>-1</sup> ) | Adsorbent dosage (g) | Contact time (min) | Desorption reagent                       | Desorption time (min) | Temperature (K) |
|------------------|-------------|-------------|---------------------------------------------|----------------------|--------------------|------------------------------------------|-----------------------|-----------------|
| Cu <sup>2+</sup> | 100         | 5           | 200                                         | 0.2                  | 240                | HNO <sub>3</sub> (1mol L <sup>-1</sup> ) | 60                    | 298K            |
|                  | 100         | 5           | 200                                         | 0.2                  | 240                | KOH (1mol L <sup>-1</sup> )              | 60                    | 298K            |
| F <sup>-</sup>   | 100         | 7           | 80                                          | 0.2                  | 240                | HNO <sub>3</sub> (1mol L <sup>-1</sup> ) | 60                    | 298K            |
|                  | 100         | 7           | 80                                          | 0.2                  | 240                | KOH (1mol L <sup>-1</sup> )              | 60                    | 298K            |

**Table S4** Experimental results on the effect of coexisting ions for selective Cu<sup>2+</sup> adsorption by FKBC.

| Coexisting Ion                | Ion concentration (mg L <sup>-1</sup> ) | Adsorption capacity (mg g <sup>-1</sup> ) | Adsorption efficiency (%) | Cu <sup>2+</sup> -adsorption capacity (mg g <sup>-1</sup> ) | Cu <sup>2+</sup> -adsorption efficiency (%) |
|-------------------------------|-----------------------------------------|-------------------------------------------|---------------------------|-------------------------------------------------------------|---------------------------------------------|
| K <sup>+</sup>                | 100                                     | 5.1                                       | 10.2                      | 90.4                                                        | 90.4                                        |
|                               | 200                                     | 8.9                                       | 8.9                       | 89.6                                                        | 89.6                                        |
|                               | 300                                     | 12.8                                      | 8.5                       | 88.8                                                        | 88.8                                        |
| Ni <sup>2+</sup>              | 100                                     | 9.6                                       | 19.2                      | 78.8                                                        | 78.8                                        |
|                               | 200                                     | 22.6                                      | 22.6                      | 69.8                                                        | 69.8                                        |
|                               | 300                                     | 55.7                                      | 37.1                      | 48.2                                                        | 48.2                                        |
| Cd <sup>2+</sup>              | 100                                     | 12.6                                      | 25.2                      | 67.4                                                        | 67.4                                        |
|                               | 200                                     | 40.2                                      | 40.2                      | 57.9                                                        | 57.9                                        |
|                               | 300                                     | 96.8                                      | 64.5                      | 25.4                                                        | 25.4                                        |
| SO <sub>4</sub> <sup>2-</sup> | 100                                     | 8.4                                       | 16.8                      | 89.8                                                        | 89.8                                        |
|                               | 200                                     | 15.6                                      | 15.6                      | 88.6                                                        | 88.6                                        |
|                               | 300                                     | 21.5                                      | 14.3                      | 88.5                                                        | 88.5                                        |
| Cl <sup>-</sup>               | 100                                     | 7.6                                       | 15.2                      | 90.6                                                        | 90.6                                        |
|                               | 200                                     | 14.2                                      | 14.2                      | 89.2                                                        | 89.2                                        |
|                               | 300                                     | 18.1                                      | 12.1                      | 88.9                                                        | 88.9                                        |

(Ni<sup>2+</sup>, Cd<sup>2+</sup> concentrations were determined by atomic absorption spectroscopy (AAS); K<sup>+</sup>, Cl<sup>-</sup>, SO<sub>4</sub><sup>2-</sup> were determined by ion chromatography (IC)).



**Table S5** Experimental results on the effect of coexisting ions for selective F<sup>-</sup> adsorption by FKBC.

| Coexisting Ion                | Ion concentration (mg L <sup>-1</sup> ) | Adsorption capacity (mg g <sup>-1</sup> ) | Adsorption efficiency (%) | F <sup>-</sup> -adsorption capacity (mg g <sup>-1</sup> ) | F <sup>-</sup> -adsorption efficiency (%) |
|-------------------------------|-----------------------------------------|-------------------------------------------|---------------------------|-----------------------------------------------------------|-------------------------------------------|
| Cl <sup>-</sup>               | 40                                      | 1.5                                       | 7.5                       | 34.9                                                      | 87.3                                      |
|                               | 80                                      | 2.2                                       | 5.5                       | 34.8                                                      | 87.0                                      |
|                               | 120                                     | 4.4                                       | 7.3                       | 34.6                                                      | 86.5                                      |
| NO <sub>3</sub> <sup>-</sup>  | 40                                      | 1.6                                       | 8.0                       | 34.8                                                      | 87.0                                      |
|                               | 80                                      | 3.3                                       | 8.3                       | 34.1                                                      | 85.3                                      |
|                               | 120                                     | 3.7                                       | 6.2                       | 33.8                                                      | 84.5                                      |
| SO <sub>4</sub> <sup>2-</sup> | 40                                      | 2.8                                       | 14.0                      | 34.6                                                      | 86.5                                      |
|                               | 80                                      | 4.6                                       | 11.5                      | 33.9                                                      | 84.8                                      |
|                               | 120                                     | 5.8                                       | 9.7                       | 32.8                                                      | 82.0                                      |
| Na <sup>+</sup>               | 40                                      | 2.3                                       | 11.5                      | 35.2                                                      | 88.0                                      |
|                               | 80                                      | 2.4                                       | 6.0                       | 34.4                                                      | 86.0                                      |
|                               | 120                                     | 3.1                                       | 5.2                       | 34.2                                                      | 85.5                                      |
| NH <sub>4</sub> <sup>+</sup>  | 40                                      | 2.4                                       | 12.0                      | 35.1                                                      | 87.8                                      |
|                               | 80                                      | 2.9                                       | 7.3                       | 34.7                                                      | 86.8                                      |
|                               | 120                                     | 4.2                                       | 7.0                       | 34.5                                                      | 86.3                                      |

(Na<sup>+</sup>, NH<sub>4</sub><sup>+</sup>, Cl<sup>-</sup>, NO<sub>3</sub><sup>-</sup>, SO<sub>4</sub><sup>2-</sup> were determined by ion chromatography (IC)).
